# Supplementary material
Source: Springer Nature journal article supplement (https://www.springermedizin.de/resource/supplementary/13063_2014_2078_MOESM1_ESM.pdf/9621322)
Supplement: MOESM1 [file 9621322]

**Partner  
Projects**

**Epigenetics**  
Munich

**Health  
Economics**  
Hamburg

**Moderators**  
Frankfurt

**EEG**  
Bielefeld

**RCT**

**Clinical  
Centers**

**Frankfurt**

**Berlin**

**Eichstätt**  
PI-Center
